# Supplementary material
Source: publisher figshare collection journal article supplement (https://sage.figshare.com/ndownloader/files/17709899)

Figure 1: Methodological quality summary: review authors' judgements about each methodological quality item for each included study.

|              | Adequate sequence generation? | Allocation concealment? | Blinding? | Free of selective reporting? | Free of other bias? |
|--------------|-------------------------------|-------------------------|-----------|------------------------------|---------------------|
| COMMANDER HF | +                             | +                       | +         | +                            | +                   |
| HELAS        | +                             |                         | +         | +                            | +                   |
| WARCEF       | +                             |                         | +         | +                            | +                   |
| WASH         |                               | -                       | -         | +                            | +                   |
| WATCH        | +                             | +                       | -         | +                            | +                   |

Figure 2: Funnel plot of comparison of oral anticoagulation versus antiplatelet or placebo for the outcome of any stroke

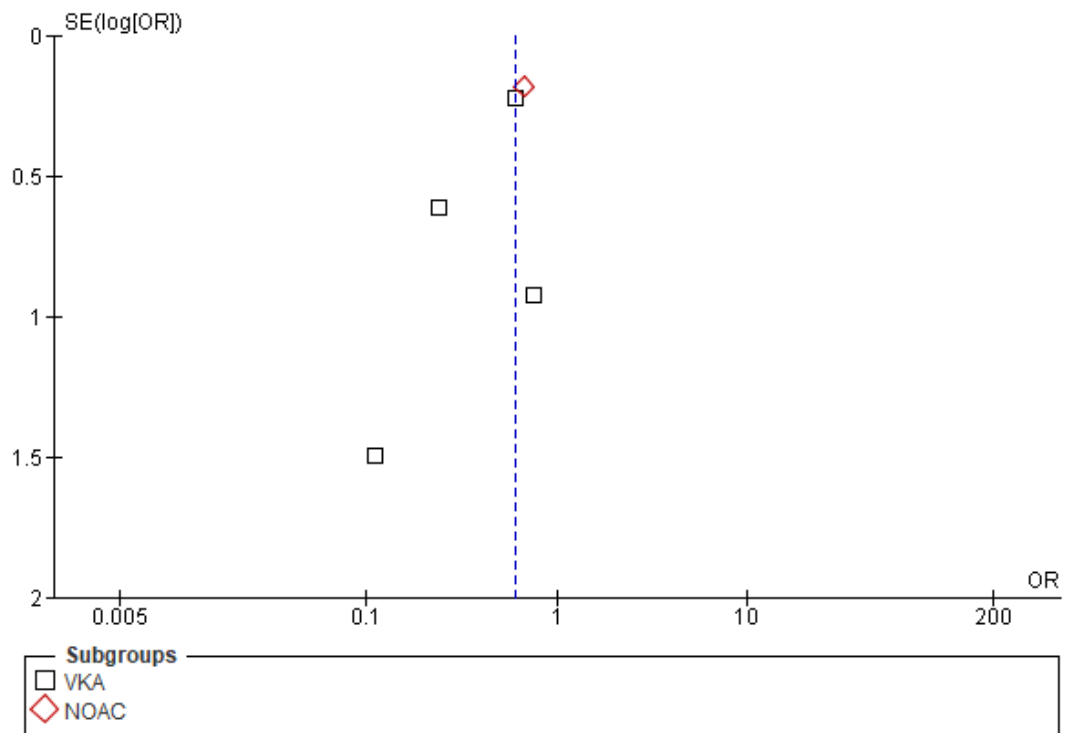

Figure 3: Funnel plot of comparison of oral anticoagulation versus antiplatelet or placebo for the outcome of major bleeding

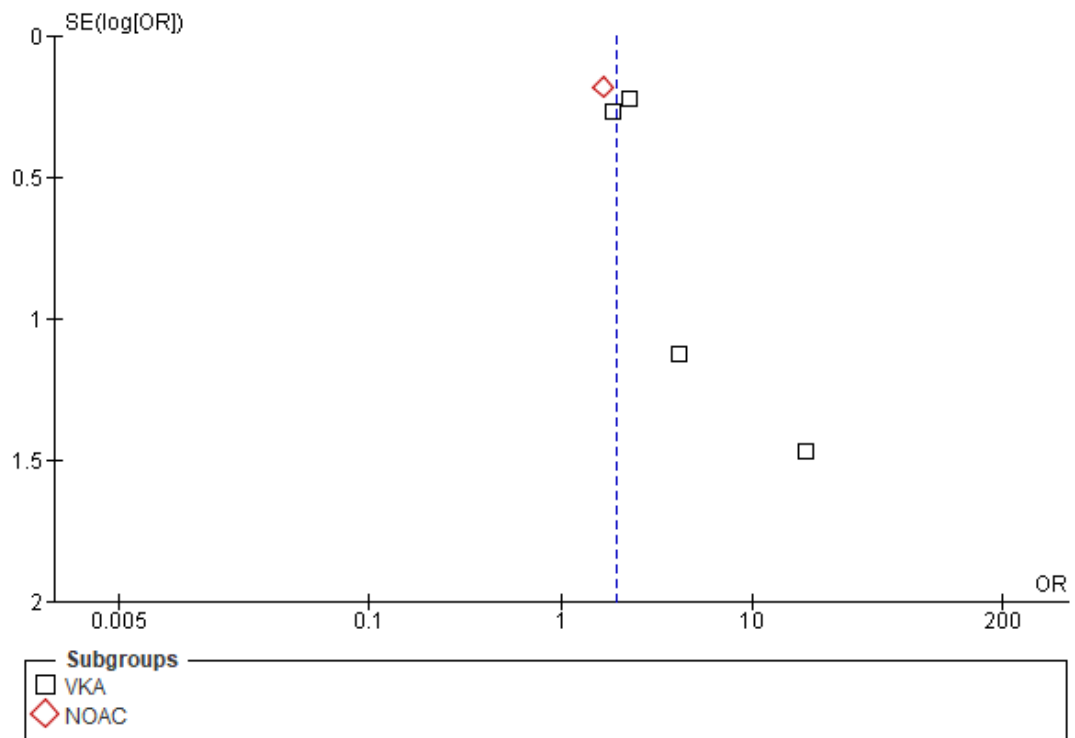

Figure 4: Funnel plot of comparison of oral anticoagulation versus antiplatelet or placebo for the outcome of death

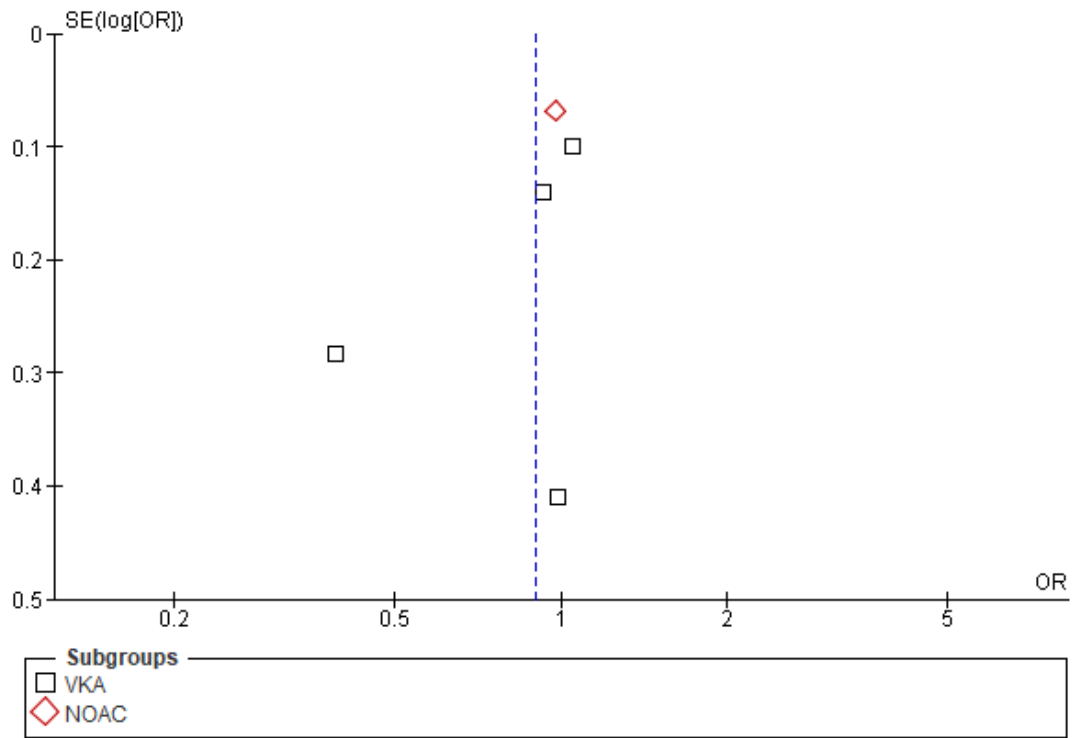

Supplement: Supplementary file 1 [file 17709899]
